# Supplementary material for: Alkalinity biases in CMIP6 Earth System Models and implications for simulated CO2 drawdown via artificial alkalinity enhancement
Source: Copernicus journal article supplement (doi:10.5194/bg-2023-26), 2023-02-09
Supplement: Supplementary file 1 [file bg-2023-26-supplement.pdf]

## Supplements

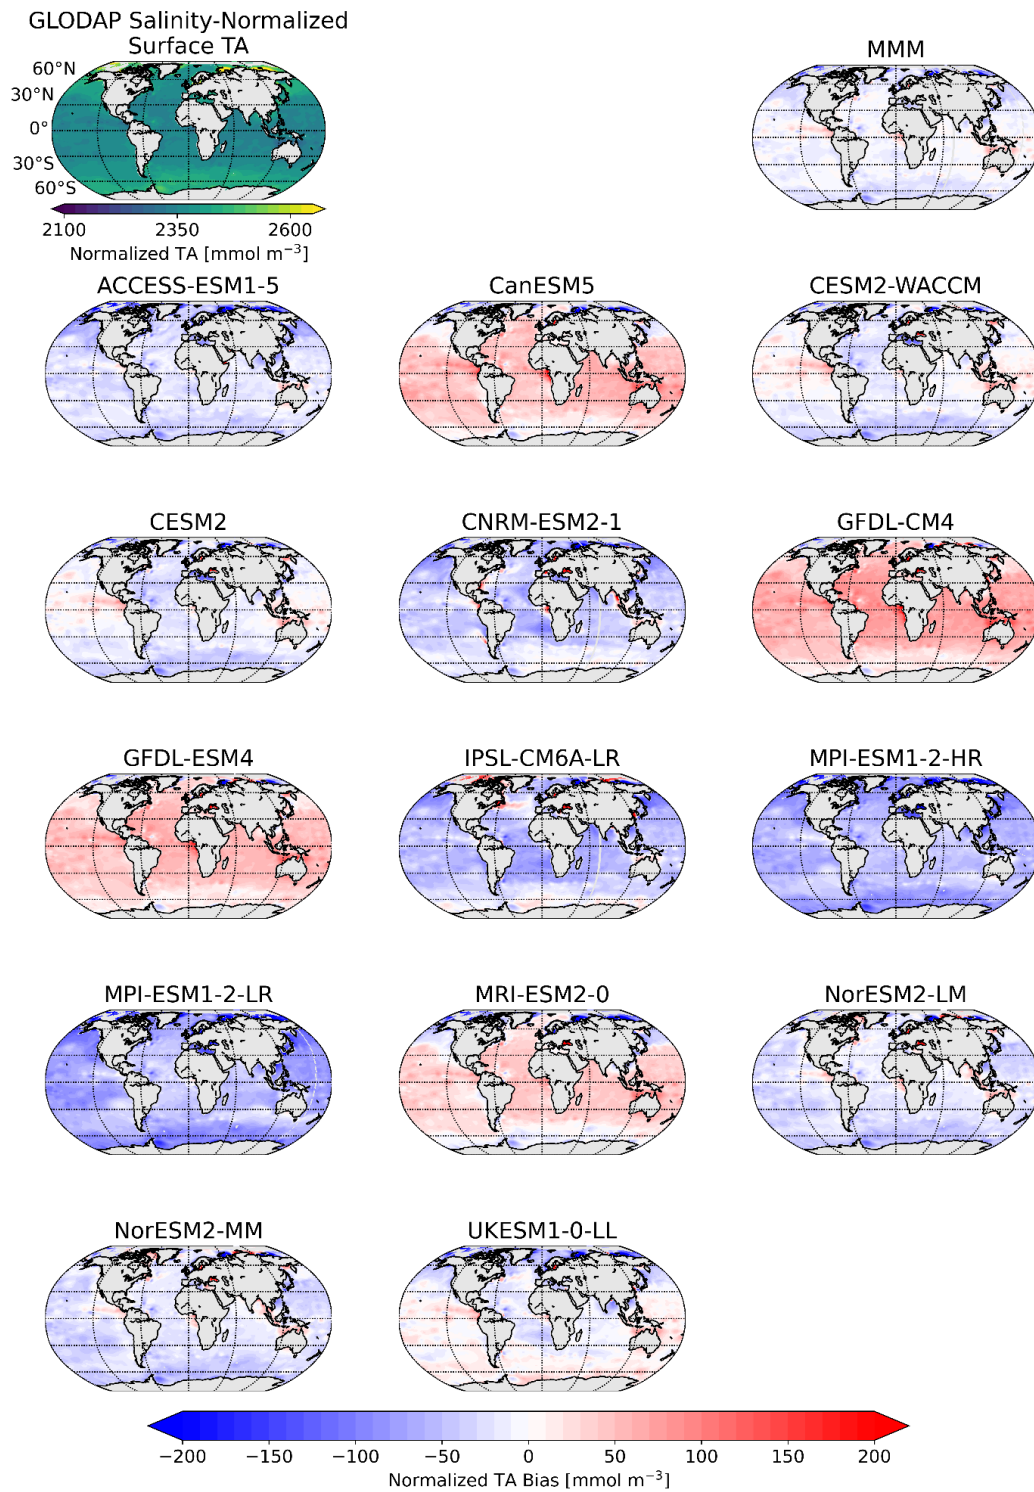

Figure S1: Surface distribution of salinity-normalized TA in GLODAP (top left) and the CMIP6 multi-model-mean (MMM) bias (top right) as well as the individual model's biases.

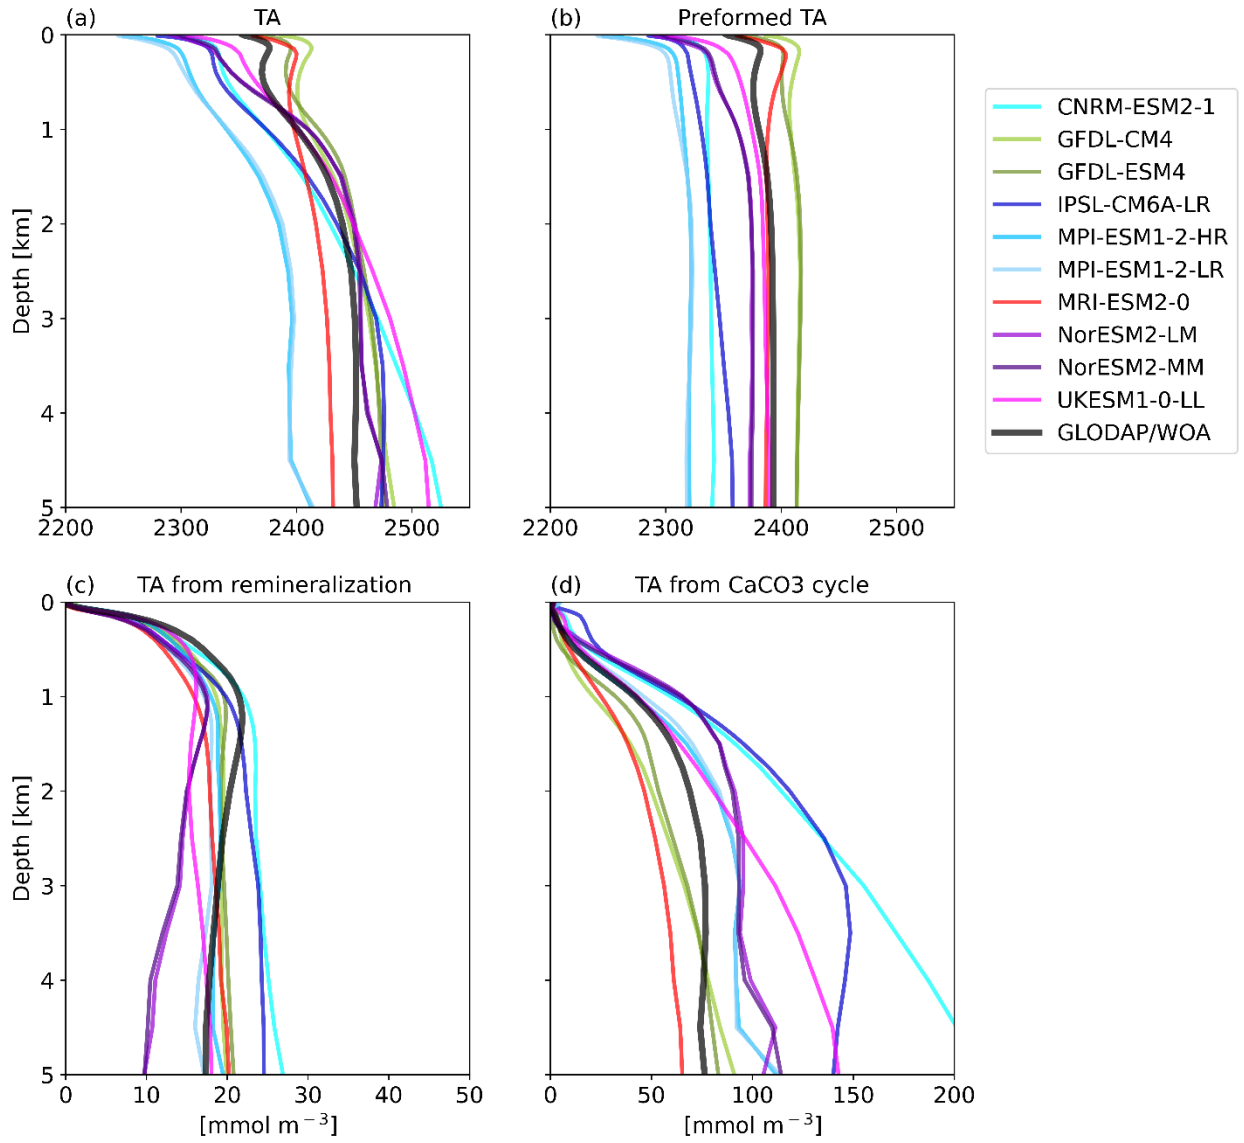

Figure S2: Globally averaged depth profiles of TA, preformed TA ( $TA^0$ ), TA from remineralization ( $TA^r$ ) and from calcium carbonate formation and dissolution ( $TA^*$ ) in 10 CMIP6 models compared to the GLODAP climatology.

5

Table S1: Input values for the CO2SYS calculation of globally averaged TA and DIC, where the CMIP6 output was converted from units of  $\text{mmol m}^{-3}$  to  $\mu\text{mol kg}^{-1}$  using a seawater density of  $1026 \text{ kg/m}^3$ .

| Modelname     | Mean surface TA<br>[ $\text{mmol m}^{-3}$ ] | Mean surface<br>DIC<br>[ $\text{mmol m}^{-3}$ ] | Mean surface TA<br>[ $\mu\text{mol kg}^{-1}$ ] | Mean surface<br>DIC<br>[ $\mu\text{mol kg}^{-1}$ ] |
|---------------|---------------------------------------------|-------------------------------------------------|------------------------------------------------|----------------------------------------------------|
| ACCESS-ESM1-5 | 2330                                        | 2050                                            | 2271                                           | 1998                                               |
| CanESM5       | 2367                                        | 2093                                            | 2307                                           | 2040                                               |
| CESM2-WACCM   | 2322                                        | 2047                                            | 2263                                           | 1995                                               |
| CESM2         | 2318                                        | 2043                                            | 2259                                           | 1991                                               |
| CNRM-ESM2-1   | 2311                                        | 2042                                            | 2252                                           | 1990                                               |
| GFDL-CM4      | 2403                                        | 2121                                            | 2342                                           | 2067                                               |
| GFDL-ESM4     | 2384                                        | 2100                                            | 2324                                           | 2047                                               |
| IPSL-CM6A-LR  | 2296                                        | 2031                                            | 2238                                           | 1980                                               |
| MPI-ESM1-2-HR | 2278                                        | 2019                                            | 2220                                           | 1968                                               |
| MPI-ESM1-2-LR | 2270                                        | 2015                                            | 2212                                           | 1964                                               |
| MRI-ESM2-0    | 2392                                        | 2103                                            | 2331                                           | 2050                                               |
| NorESM2-LM    | 2305                                        | 2033                                            | 2247                                           | 1981                                               |
| NorESM2-MM    | 2308                                        | 2039                                            | 2250                                           | 1987                                               |
| UKESM1-0-LL   | 2323                                        | 2054                                            | 2264                                           | 2002                                               |
| <b>GLODAP</b> | <b>2354</b>                                 | <b>2071</b>                                     | <b>2294</b>                                    | <b>2019</b>                                        |

Table S2:  $p\text{CO}_2$  differences in % with respect to GLODAP after an artificial TA increase of 100, 200, 500 or 1.000  $\mu\text{mol kg}^{-1}$  for each model as computed with CO2SYS. This computation does NOT account for ocean-air exchange of  $\text{CO}_2$  or for chemical reaction upon alkalinity addition. The minimum and the maximum difference values for each case are marked in bold.

| TA increase ( $\mu\text{mol kg}^{-1}$ ) | 100                                               | 200          | 500          | 1000         |
|-----------------------------------------|---------------------------------------------------|--------------|--------------|--------------|
| Modelname                               | $p\text{CO}_2$ difference compared to GLODAP in % |              |              |              |
| ACCESS-ESM1-5                           | 0.16                                              | 0.00         | -0.24        | <b>-0.41</b> |
| CanESM5                                 | 6.90                                              | 6.54         | 6.00         | 5.71         |
| CESM2-WACCM                             | 2.83                                              | 2.44         | 1.86         | 1.50         |
| CESM2                                   | 2.53                                              | 2.14         | 1.54         | 1.17         |
| CNRM-ESM2-1                             | 6.06                                              | 5.38         | 4.36         | 3.75         |
| GFDL-CM4                                | 4.22                                              | 4.26         | 4.34         | 4.44         |
| GFDL-ESM4                               | 1.54                                              | 1.63         | 1.77         | 1.89         |
| IPSL-CM6A-LR                            | 7.70                                              | 6.81         | 5.47         | 4.66         |
| MPI-ESM1-2-HR                           | 10.63                                             | 9.39         | 7.55         | 6.45         |
| MPI-ESM1-2-LR                           | <b>12.98</b>                                      | <b>11.51</b> | <b>9.33</b>  | <b>8.04</b>  |
| MRI-ESM2-0                              | <b>-1.02</b>                                      | <b>-0.73</b> | <b>-0.28</b> | 0.03         |
| NorESM2-LM                              | 3.55                                              | 3.01         | 2.18         | 1.67         |
| NorESM2-MM                              | 5.83                                              | 5.15         | 4.12         | 3.50         |
| UKESM1-0-LL                             | 6.99                                              | 6.33         | 5.33         | 4.75         |
